# Supplementary material for: Cell Wall Components and Extensibility Regulate Root Growth in Suaeda salsa and Spinacia oleracea under Salinity
Source: MDPI journal article supplement (doi:10.3390/plants11070900), 2022-03-28
Supplement: s1 [file s1]

*S. Salsa*

*S. oleracea*

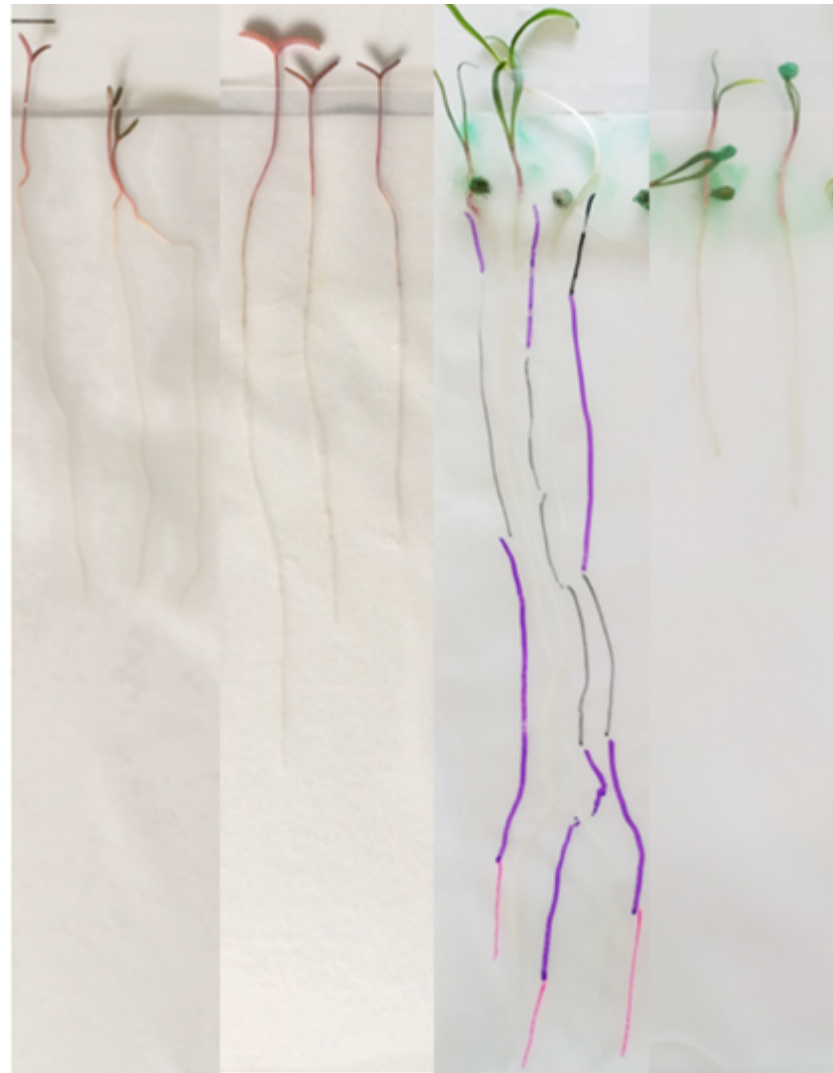

0 mM

200 Mm

0 mM

200mM

**Figure S1.** Roots of *Suaeda salsa* and *Spinacia oleracea* 8 days after 0 and 200 mM NaCl treatments.
